# Supplementary material for: Long-term mortality following interhospital transfer for acute myocardial infarction
Source: HighWire-hosted journal article supplement (doi:10.1136/heartjnl-2014-306966), 2015-03-03
Supplement: heartjnl-2014-306966supp.pdf [file heartjnl-2014-306966supp.pdf]

# **Long-Term Mortality Following Inter-hospital Transfer for Acute Myocardial Infarction: An Observational Cohort Study**

Isuru Ranasinghe, MBChB, MMed(Clin. Epi.), PhD, Federica Barzi, PhD, David Brieger, MBBS, PhD, Martin Gallagher, MBBS, MPH, PhD

## **Supplementary Appendix**

### **Contents**

1. Variables considered in the propensity analysis
  - a. Variables included in the propensity score analysis
  - b. Acute complications at presentation
  - c. Covariate balance pre and post propensity score matching (all variables)
2. Subgroup analysis of the association between inter-hospital transfer and long-term mortality stratified by the type of AMI (STEMI vs NSTEMI)
3. Inverse probability treatment weighted (IPTW) propensity analysis
  - a. Method
  - b. Covariate balance post IPTW analysis
  - c. Comparison of mortality following IPTW adjusted analysis
4. Supplemental Figures
5. Supplementary appendix references

## **1. Variables considered in the propensity analysis**

### **1A. Variables included in the propensity score analysis**

- (1) Demographic characteristics and diagnosis at index presentation as coded in the New South Wales admitted patient data collection (NSWAPDC). These specifically include age at admission, sex, proportion of patients using private health insurance cover, admission year, and principle ICD10AM diagnosis at index presentation
- (2) Variables encompassing past cardiac history and comorbidities at presentation derived from index admission and admissions occurring within the 12 months immediately preceding the date of index hospitalization (see below)
- (3) Variables encompassing acute complications typical of AMI admission derived from secondary diagnosis codes at the initial presenting hospital at index hospitalization (see below)
- (4) Variables encompassing hospital service/capacity and hospital region- diagnostic angiography and revascularization capability, region (major cities vs. regional or remote hospitals) and hospital peer group category. The Australian hospital peer group categories classify all public hospitals based on size and number of case mix adjusted acute presentations and are categorized as principle referral, large, medium and small acute hospitals. Private hospitals are not categorized based on this classification and therefore are recorded as private hospitals only.

Variables representing patient past cardiac history and comorbidities were derived from the administrative diagnostic codes assembled in to condition categories (CC) which group clinically coherent diagnostic codes into single variables. The CC candidate variables considered for this analysis were derived from the secondary diagnosis and procedure codes from the index hospitalization and from the principal and secondary ICD10AM diagnosis codes from all hospitalizations in the 12 months preceding the index hospitalization. The

methods for deriving CC variables from administrative data have been extensively described elsewhere(1, 2). The CC derived variables included in the analysis has been previously shown to be a robust measure of patient risk status and to be superior to other methods in predicting mortality including AMI specific mortality.(3, 4) In this analysis, ICD9 diagnosis codes were cross-walked to matching ICD10AM diagnostic code for each CC and were only derived from inpatient data.

**1B. Acute Complications**

Acute complications were derived from secondary ICD10 diagnostic coding from the initial hospital of presentation during the index hospitalization (i.e. acute complication occurring prior to potential transfer). Acute complications included typical complications encountered during AMI presentations and are indicated below with the corresponding ICD10 coding. With the exception of CHF, the ICD10AM coding used to derive the acute complications represent acute complications only and are specifically excluded from assessment of background history derived from the CC model described above to prevent double counting. ICD10AM coding does not distinguish congestive heart failure (CHF) as acute or chronic.

| <b>Acute complication</b>      | <b>ICD10AM coding</b>                                                                                                                                                       |
|--------------------------------|-----------------------------------------------------------------------------------------------------------------------------------------------------------------------------|
| Mechanical Complication of AMI | 123.0-123.8                                                                                                                                                                 |
| Cardiogenic Shock              | R57.0                                                                                                                                                                       |
| Cardiac Arrest                 | I46.0, I46.1, I46.9,                                                                                                                                                        |
| Ventricular arrhythmia         | VT (I47.2), Vfib/flutter (I49.0)                                                                                                                                            |
| Acute renal failure            | N17.0-N17.2,N17.8, N17.9                                                                                                                                                    |
| Ischemic Stroke                | I63.0-I63.9                                                                                                                                                                 |
| Major Bleeding (all cause)     | Multiple codes to identify all cause bleeding derived from ICD10AM equivalent of ICD9 diagnostic codes previously published in the literature to identify major bleeding(5) |
|                                | I85.0, K22.6, K25.0, K25.2, K25.4, K25.6, K26.0, K26.2, K26.4, K26.6, K27.0, K27.2 K27.4, K27.6, K28.0, K28.4,                                                              |

---

**Congestive Heart Failure**

---

K28.6, K29.0, K62.5, K66.1, K92.0, K92.1, K92.2, I60.0, I60.1  
I60.2, I60.3, I60.4, I60.5, I60.6, I60.7, I60.8, I60.9, I61.0, I61.1, I61.2, I61.3, I61.4, I61.5, I61.6, I61.8, I61.9, I62.0, I62.1, I62.9, N02.0, N02.1, N02.2, N02.3, N02.4, N02.5, N02.6, N02.7, N02.8, N02.9, R31, R31.0, R31.1, R31.8, R04.0, R04.1, R04.2, R04.8, R04.9, R58, T81.0  
I50.0, I50.1 and I50.9

---

**1C. Covariate balance pre and post propensity score matching (all variables)**

---

**Supplementary Table 1: Baseline Characteristics (All Variables)**

---

|                                        | Unadjusted data |               |         | PS matched cohort |               |         |
|----------------------------------------|-----------------|---------------|---------|-------------------|---------------|---------|
|                                        | Transfer        | Non- Transfer | P Value | Transfer          | Non- Transfer | P Value |
|                                        | N=10107         | N=30375       |         | N=8427            | N=8427        |         |
| Age (median± SD)                       | 65.1±12.9       | 70.8±14.1     | <0.01   | 66.9±12.5         | 67.3±14.6     | 0.06    |
| % Male                                 | 7129 (70.5)     | 18809 (61.9)  | <0.01   | 5684 (67.5)       | 5634 (66.9)   | 0.41    |
| Private insurance                      | 2599 (25.7)     | 6406 (21.1)   |         | 1969 (23.4)       | 1995 (23.7)   | 0.64    |
| Year of presentation                   |                 |               |         |                   |               |         |
| - 2004                                 | 1140 (11.3)     | 4630 (15.2)   | <0.01   | 1030 (12.3)       | 1023 (12.1)   | 0.99    |
| - 2005                                 | 2181 (21.6)     | 7372 (24.3)   |         | 1868 (22.2)       | 1854 (22.0)   |         |
| - 2006                                 | 2638 (26.1)     | 7211 (23.7)   |         | 2171 (25.8)       | 2157 (25.6)   |         |
| - 2007                                 | 2772 (27.4)     | 7580 (25.0)   |         | 2242 (26.6)       | 2267 (26.9)   |         |
| - 2008                                 | 1376 (13.6)     | 3582 (11.8)   |         | 1116 (13.2)       | 1126 (13.4)   |         |
| Principle diagnosis at index admission |                 |               |         |                   |               |         |
| - STEMI                                | 4175 (41.3)     | 10015 (33.0)  | <0.01   | 3124 (37.1)       | 3037 (36.0)   | 0.16    |
| - NSTEMI                               | 5932 (58.7)     | 20360 (67.0)  |         | 5303 (62.9)       | 5390 (64.0)   |         |
| <b>Cardiovascular history*</b>         |                 |               |         |                   |               |         |
| PTCA (CC 199)                          | 100 (1.0)       | 388 (1.3)     | 0.02    | 91 (1.1)          | 76 (0.9)      | 0.24    |
| CABG (CC 200)                          | 14 (0.14)       | 71 (0.23)     | 0.07    | 13 (0.2)          | 15 (0.2)      | 0.71    |
| Heart failure (CC 80)                  | 1026 (10.2)     | 6379 (21.0)   | <0.01   | 239 (2.8)         | 267 (3.2)     | 0.21    |

---

|                                                                                      |             |              |       |             |             |      |
|--------------------------------------------------------------------------------------|-------------|--------------|-------|-------------|-------------|------|
| AMI (CC 81)                                                                          | 1378 (13.6) | 4626 (15.2)  | <0.01 | 119 (1.4)   | 145 (1.7)   | 0.11 |
| Unstable angina (CC 82)                                                              | 2044 (20.2) | 7374 (24.3)  | <0.01 | 394 (4.7)   | 427 (5.1)   | 0.24 |
| Chronic atherosclerosis (CC 83, 84)                                                  | 5776 (57.2) | 22254 (73.3) | <0.01 | 3216 (38.2) | 3140 (37.3) | 0.23 |
| Cardiopulmonary-respiratory failure or shock (CC 79)                                 | 324 (3.2)   | 1538 (5.1)   | <0.01 | 45 (0.5)    | 39 (0.5)    | 0.51 |
| Valvular heart disease (CC 86)                                                       | 439 (4.3)   | 2752 (9.1)   | <0.01 | 263 (3.1)   | 324 (3.8)   | 0.01 |
| <b>Comorbidity*</b>                                                                  |             |              |       |             |             |      |
| Hypertension (CC 89, 91)                                                             | 6027 (59.6) | 20013 (65.9) | <0.01 | 4412 (52.4) | 4444 (52.7) | 0.62 |
| Stroke (CC 95, 96)                                                                   | 183 (0.5)   | 850 (2.8)    | <0.01 | 38 (0.5)    | 38 (0.5)    | 1.00 |
| Cerebrovascular disease (CC 97,98,99,103)                                            | 255 (2.5)   | 1211 (4.0)   | <0.01 | 75 (0.9)    | 76(0.9)     | 0.93 |
| Renal failure (CC 131)                                                               | 693 (6.9)   | 3877 (12.8)  | <0.01 | 149 (1.8)   | 153 (1.8)   | 0.82 |
| COPD (CC 108)                                                                        | 666 (6.6)   | 3409 (11.2)  | <0.01 | 439 (5.2)   | 449 (5.3)   | 0.73 |
| Pneumonia (CC 111, 112, 113)                                                         | 271 (2.7)   | 1596 (5.3)   | <0.01 | 75 (0.9)    | 81 (1.0)    | 0.63 |
| Diabetes (CC 15-20, 120)                                                             | 1706 (16.9) | 6328 (20.8)  | <0.01 | 1134 (13.5) | 1117 (13.3) | 0.70 |
| Protein-caloric malnutrition (CC 21)                                                 | 55 (0.5)    | 351 (1.2)    | <0.01 | 10 (0.1)    | 11 (0.1)    | 0.83 |
| Dementia (CC 49-50)                                                                  | 207 (2.1)   | 2430 (8.0)   | <0.01 | 86 (1.0)    | 111 (1.3)   | 0.07 |
| Hemiplegia, paraplegia, paralysis, functional disability (CC 68,69,100-102, 177,178) | 474 (4.7)   | 2417 (8.0)   | <0.01 | 153 (1.8)   | 169 (2.0)   | 0.37 |
| Peripheral vascular disease (CC 104, 105)                                            | 789 (7.8)   | 3342 (11.0)  | <0.01 | 212 (2.5)   | 228 (2.7)   | 0.44 |
| Metastatic cancer (CC 7,8)                                                           | 214 (2.1)   | 1025 (3.4)   | <0.01 | 58 (0.7)    | 71 (0.8)    | 0.26 |
| Trauma (CC 154-156, 158-162)                                                         | 641 (6.3)   | 3277 (10.8)  | <0.01 | 230 (2.7)   | 266 (3.2)   | 0.10 |
| Major psychiatric disorder (CC 54-56)                                                | 88 (0.9)    | 398 (1.3)    | 0.05  | 45 (0.5)    | 45 (0.5)    | 1.00 |
| Chronic liver disease (CC 25-27)                                                     | 84 (0.8)    | 349 (1.2)    | 0.01  | 43 (0.5)    | 42 (0.5)    | 0.91 |
| HIV/AIDS (CC1)                                                                       | 54 (0.2)    | 7 (0.1)      | 0.01  | 9 (0.1)     | 7 (0.1)     | 0.62 |
| Septicemia/Shock (CC2)                                                               | 310 (1.0)   | 34 (0.3)     | <0.01 | 30 (0.4)    | 33 (0.4)    | 0.70 |
| Opportunistic infections (CC5)                                                       | 93 (0.3)    | 7 (0.1)      | <0.01 | 7 (0.1)     | 6 (0.1)     | 0.78 |
| Lymphatic, head and neck, brain, and other major cancers (CC9)                       | 206 (0.7)   | 31 (0.3)     | <0.01 | 37 (0.4)    | 31 (0.4)    | 0.47 |
| Breast, prostate, colorectal and other cancers and tumors (CC10)                     | 697 (2.3)   | 145 (1.4)    | <0.01 | 134 (1.6)   | 137 (1.6)   | 0.85 |
| Intestinal obstruction/perforation                                                   | 257 (0.9)   | 45 (0.5)     | <0.01 | 45 (0.5)    | 44 (0.5)    | 0.92 |
| Pancreatic disease (CC 32)                                                           | 68 (0.2)    | 14 (0.1)     | 0.10  | 5 (0.1)     | 13 (0.2)    | 0.06 |
| Inflammatory bowel disease (CC 33)                                                   | 64 (0.2)    | 16 (0.2)     | 0.30  | 18 (0.2)    | 16 (0.2)    | 0.73 |
| Bone/joint/muscle infections/necrosis (CC 37)                                        | 117 (0.4)   | 14 (0.1)     | <0.01 | 11 (0.1)    | 14 (0.2)    | 0.55 |

|                                                                      |            |            |       |           |           |      |
|----------------------------------------------------------------------|------------|------------|-------|-----------|-----------|------|
| Rheumatoid Arthritis, Inflammatory Connective Tissue Disease (CC 38) | 349 (1.2)  | 76 (0.8)   | <0.01 | 69 (0.8)  | 72 (0.9)  | 0.78 |
| Severe Hematological Disorders (CC 44)                               | 167 (0.6)  | 19 (0.2)   | <0.01 | 18 (0.2)  | 19 (0.2)  | 0.87 |
| Disorders of Immunity (CC 45)                                        | 38 (0.1)   | 4 (0.0)    | 0.02  | 4 (0.1)   | 4 (0.1)   | 1.00 |
| Drug/Alcohol Psychosis (CC 51)                                       | 213 (0.7)  | 45 (0.5)   | 0.01  | 50 (0.6)  | 42 (0.5)  | 0.40 |
| Drug/Alcohol Dependence (CC 52)                                      | 325 (1.1)  | 93 (0.9)   | 0.12  | 89 (1.1)  | 87 (1.0)  | 0.88 |
| Schizophrenia (CC 54)                                                | 98 (0.3)   | 21 (0.2)   | 0.06  | 24 (0.3)  | 20 (0.2)  | 0.55 |
| Major Depressive, Bipolar, and Paranoid Disorders (CCC 55)           | 154 (0.5)  | 28 (0.3)   | <0.01 | 25 (0.3)  | 27 (0.3)  | 0.78 |
| Polyneuropathy (CC 71)                                               | 407 (1.3)  | 72 (0.7)   | <0.01 | 71 (0.8)  | 71 (0.8)  | 1.00 |
| Multiple Sclerosis (CC 72)                                           | 20 (0.1)   | 8 (0.1)    | 0.66  | 8 (0.1)   | 8 (0.1)   | 1.00 |
| Parkinson's and Huntington's Diseases (CC 73)                        | 276 (0.9)  | 26 (0.3)   | <0.01 | 25 (0.3)  | 26 (0.3)  | 0.89 |
| Seizure Disorders and Convulsions (CC 74)                            | 169 (0.6)  | 23 (0.2)   | <0.01 | 24 (0.3)  | 23 (0.3)  | 0.88 |
| Coma, Brain Compression/Anoxic Damage (CC 75)                        | 166 (0.6)  | 11 (0.1)   | <0.01 | 11 (0.1)  | 11 (0.1)  | 1.00 |
| Respirator Dependence/Tracheostomy Status (CC 77)                    | 32 (0.1)   | 3 (0.0)    | 0.03  | 7 (0.1)   | 3 (0.0)   | 0.20 |
| Respiratory Arrest (CC 78)                                           | 45 (0.2)   | 7 (0.1)    | 0.06  | 9 (0.1)   | 6 (0.1)   | 0.44 |
| Proliferative Diabetic Retinopathy and Vitreous Hemorrhage (CC 119)  | 13 (0.0)   | 3 (0.0)    | 0.56  | 2 (0.0)   | 3 (0.0)   | 1.00 |
| Dialysis Status (CC 130)                                             | 242 (0.8)  | 34 (0.3)   | <0.01 | 22 (0.3)  | 34 (0.4)  | 0.11 |
| Nephritis (CC 132)                                                   | 47 (0.2)   | 8 (0.1)    | 0.07  | 9 (0.1)   | 8 (0.1)   | 0.81 |
| Specified Heart Arrhythmias (CC 92)                                  | 2256 (7.4) | 325 (3.2)  | <0.01 | 346 (4.1) | 314 (3.7) | 0.20 |
| Decubitus Ulcer of Skin (CC 148)                                     | 226 (0.7)  | 20 (0.2)   | <0.01 | 15 (0.2)  | 20 (0.2)  | 0.40 |
| Chronic Ulcer of Skin, Except Decubitus (CC 149)                     | 508 (1.7)  | 63 (0.6)   | <0.01 | 76 (0.9)  | 62 (0.7)  | 0.23 |
| Vertebral Fractures without Spinal Cord Injury (CC 157)              | 11 (0.0)   | 3 (0.0)    | 0.76  | 6 (0.1)   | 3 (0.0)   | 0.32 |
| Major Complications of Medical Care and Trauma (CC 164)              | 1183 (3.9) | 188 (1.9)  | <0.01 | 176 (2.1) | 184 (2.2) | 0.67 |
| Major Organ Transplant Status (CC 174)                               | 36 (0.1)   | 12 (0.1)   | 1.00  | 11 (0.1)  | 11 (0.1)  | 1.00 |
| Artificial Openings for Feeding or Elimination (CC 176)              | 258 (0.9)  | 45 (0.5)   | <0.01 | 40 (0.5)  | 42 (0.5)  | 0.82 |
| <b>Acute Complications</b>                                           |            |            |       |           |           |      |
| Mechanical Complication of AMI                                       | 8 (0.1)    | 61 (0.2)   | 0.01  | 8 (0.1)   | 9 (0.1)   | 0.81 |
| Cardiogenic Shock                                                    | 74 (0.7)   | 611 (2.0)  | <0.01 | 71 (0.8)  | 76 (0.9)  | 0.68 |
| Cardiac Arrest                                                       | 138 (1.4)  | 800 (2.6)  | <0.01 | 124 (1.5) | 116 (1.4) | 0.60 |
| Ventricular Arrhythmia(VT/VF)                                        | 234 (2.3)  | 976 (3.2)  | <0.01 | 194 (2.3) | 197 (2.3) | 0.88 |
| Acute Renal Failure                                                  | 144 (1.4)  | 1658 (5.5) | <0.01 | 143 (1.7) | 154 (1.8) | 0.52 |

|                                             |             |              |       |             |             |      |
|---------------------------------------------|-------------|--------------|-------|-------------|-------------|------|
| Ischemic Stroke                             | 10 (0.1)    | 192 (0.6)    | <0.01 | 10 (0.1)    | 10 (0.1)    | 1.00 |
| Major Bleeding                              | 157 (1.6)   | 1318 (4.3)   | <0.01 | 156 (1.9)   | 168 (2.0)   | 0.50 |
| Heart Failure                               | 739 (7.3)   | 5439 (17.9)  | <0.01 | 731 (8.7)   | 736(8.7)    | 0.89 |
| <b>Presenting Hospital Characteristics</b>  |             |              |       |             |             |      |
| Hospital region                             |             |              |       |             |             |      |
| - Major city area                           | 6746 (66.8) | 23934 (78.8) | <0.01 | 5459 (64.8) | 5489 (65.1) | 0.69 |
| - Regional hospital                         | 3361 (33.3) | 6441 (21.2)  | <0.01 | 2968 (35.2) | 2938 (35.9) |      |
| Hospital Peer Group                         |             |              |       |             |             |      |
| - Principle referral                        | 5783 (57.2) | 21539 (70.9) | <0.01 | 4946 (58.7) | 4953 (58.8) | 0.32 |
| - Large hospital                            | 2799 (27.7) | 4235 (14.5)  |       | 2115 (25.1) | 2171 (25.8) |      |
| - Medium hospital                           | 826 (8.2)   | 1970 (6.5)   |       | 784 (9.3)   | 735(8.7)    |      |
| - Small acute hospital                      | 340 (3.4)   | 373 (1.2)    |       | 229 (2.7)   | 248 (2.9)   |      |
| - Private hospital                          | 359 (3.6)   | 2258 (7.4)   |       | 353 (4.2)   | 320 (3.2)   |      |
| Revascularization capable (PCI and/or CABG) | 2269 (22.5) | 17966 (59.2) | <0.01 | 2260 (26.8) | 2181 (25.9) | 0.17 |

Abbreviations are as described within the manuscript text.

**2. Subgroup analysis of the effect of inter-hospital transfer on long-term mortality stratified by the type of AMI (STEMI vs NSTEMI)**

| Subgroup                         | STEMI*                              |          |          |       | NSTEMI*   |          |           |       |           |
|----------------------------------|-------------------------------------|----------|----------|-------|-----------|----------|-----------|-------|-----------|
|                                  | IHT                                 | No IHT   | OR       | 95%CI | IHT       | No IHT   | OR        | 95%CI |           |
| Age                              | <65                                 | 80/1395  | 109/1398 | 0.73  | 0.54-0.97 | 111/2263 | 137/2326  | 0.83  | 0.68-1.07 |
|                                  | ≥65                                 | 371/1547 | 577/1544 | 0.59  | 0.58-0.67 | 706/3232 | 1093/3169 | 0.57  | 0.52-0.63 |
| Region                           | Major City                          | 272/1656 | 384/1677 | 0.68  | 0.59-0.80 | 592/3850 | 900/3791  | 0.61  | 0.55-0.68 |
|                                  | Regional Hospital                   | 179/1286 | 302/1265 | 0.56  | 0.46-0.67 | 225/1645 | 330/1704  | 0.68  | 0.57-0.80 |
|                                  | Revascularization capable hospitals | 116/788  | 121/759  | 0.90  | 0.70-1.16 | 219/1466 | 268/1439  | 0.79  | 0.66-0.95 |
|                                  | Non-Revascularization hospitals     | 335/2154 | 565/2183 | 0.57  | 0.50-0.65 | 598/4029 | 962/4056  | 0.59  | 0.53-0.65 |
|                                  | Public hospitals only               | 435/2775 | 652/2762 | 0.63  | 0.56-0.71 | 801/5316 | 1198/5296 | 0.63  | 0.58-0.69 |
|                                  | Excluding in-hospital deaths        | 305/2796 | 406/2662 | 0.70  | 0.61-0.82 | 727/5405 | 1105/5370 | 0.62  | 0.57-0.68 |
| By risk quartile at presentation |                                     |          |          |       |           |          |           |       |           |
|                                  | Quartile 1 (lowest risk)            | 27/689   | 37/782   | 0.82  | 0.50-1.34 | 58/1262  | 76/1485   | 0.91  | 0.65-1.28 |
|                                  | Quartile 2                          | 54/796   | 58/675   | 0.80  | 0.55-1.15 | 66/1465  | 96/1283   | 0.61  | 0.44-0.82 |
|                                  | Quartile 3                          | 124/784  | 124/687  | 0.88  | 0.69-1.13 | 229/1513 | 248/1235  | 0.72  | 0.60-0.86 |
|                                  | Quartile 4 (highest risk)           | 246/673  | 467/798  | 0.53  | 0.45-0.61 | 464/1255 | 810/1492  | 0.58  | 0.51-0.64 |

\*STEMI cohort included 5,884 patients and NSTEMI cohort included 10,990 patients. Each propensity score matched cohort included an equal proportion of transferred and non-transferred patients.



### **3. Inverse probability treatment weighted (IPTW) propensity analysis**

#### **3A. Method**

Propensity score matching allows the most robust estimation of the average treatment effect for the treated (ATT), i.e. the effect on mortality for those who were transferred.<sup>(6)</sup> However, matching excludes a significant proportion of the population who are unmatched. To evaluate whether the survival benefit of IHT evident in the PSM cohort is applicable to the entire population, we conducted an Inverse Probability Treatment Weighted (IPTW) propensity score analysis. For this analysis mortality was adjusted for baseline covariates by weighting the analysis using IPTWs derived from the propensity score. IPTW method allow estimation of the average effect of treatment in the entire study population, i.e. the expected effect on mortality for the entire population if the entire population was assumed to have received IHT.<sup>(6)</sup> Adequacy of the IPTW propensity score model was assessed by comparing covariate balance before and after IPTW adjustment using standardized differences.

#### **3B. Covariate balance post IPTW PS analysis**

Covariate Balance post IPTW analysis is indicated in figure below. Median standardized difference post IPTW analysis was 2.20 (IQR 1.13-4.51) indicating a significant improvement in covariate balance from baseline (median standardized difference 8.31, IQR 4.2-16.0) but slightly inferior to covariate balance following propensity score matching (median standardized difference 0.74, IQR 0.28-1.42). Irrespective, all covariates were at or below 10, the general accepted threshold below which covariate imbalance is considered insignificant.<sup>(6)</sup>

**Figure:** Covariate balance between transferred and non-transferred cohorts for individual covariates (as measured by the absolute standardised difference) prior to propensity score analyses and following propensity score matching and IPTW analyses respectively. The figure shows that both propensity score methods achieve good covariate balance (as indicated by a standardised difference <10 for all covariates [red line]). However, propensity score matching (green dots) achieved a slightly superior covariate balance compared with the IPTW method (red dots) as indicated by a lower standardised difference for most covariates.

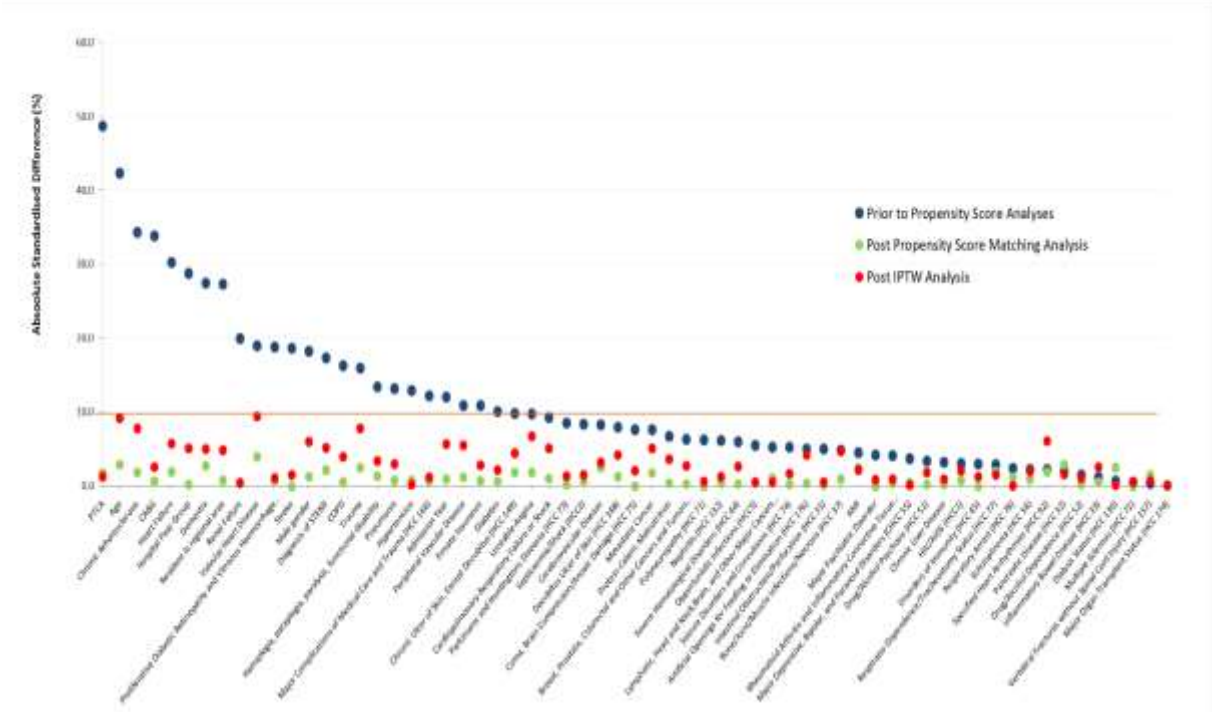

### 3C. Comparison of mortality following IPTW adjusted analysis

| <b>Mortality</b>      | <b>Unadjusted<br/>Point Estimate†<br/>(95%CI)</b> | <b>PSM cohort<br/>Point Estimate†<br/>(95%CI)</b> | <b>IPTW adjusted<br/>Point Estimate†<br/>(95%CI)</b> |
|-----------------------|---------------------------------------------------|---------------------------------------------------|------------------------------------------------------|
| In-hospital Mortality | 0.37 (0.33-0.42)                                  | 0.67 (0.57- 0.79)                                 | 0.69 (0.61-0.77)                                     |
| 30 day                | 0.35 (0.31-0.40)                                  | 0.60 (0.52-0.70)                                  | 0.65 (0.59-0.71)                                     |
| 1 year                | 0.34 (0.31-0.37)                                  | 0.58 (0.52-0.64)                                  | 0.67 (0.62-0.71)                                     |
| Long-term Mortality#  | 0.40 (0.38-0.42)                                  | 0.65 (0.61-0.70)                                  | 0.76 (0.74-0.79)                                     |

† Point estimate given are Relative Risk (RR) for revascularization and in-hospital mortality. Point estimate shown for 30 day, 1 year and long-term mortality are Hazard Ratios (HR). In both cases the non-transfer group is referent group

# Mean follow-up time 3.5 years (min 1.5 years, max 5.5 years).

## 4. Supplemental Figures

**Figure S1:** The distribution of the Propensity Score by the actual transfer status.

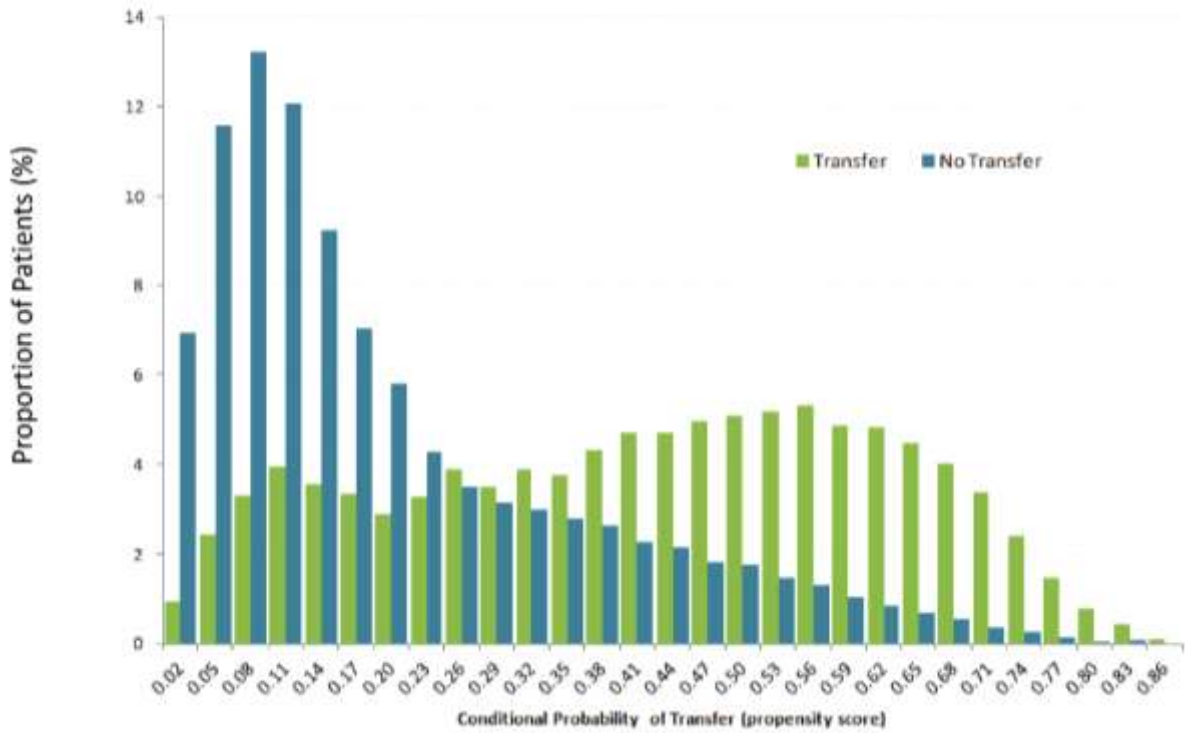

**Figure S2:** Subgroup analysis of 30-day mortality between transferred and non-transferred patients. †P for statistical interaction with IHT, \*No interaction term calculated as in-hospital death directly affects 30-day mortality.

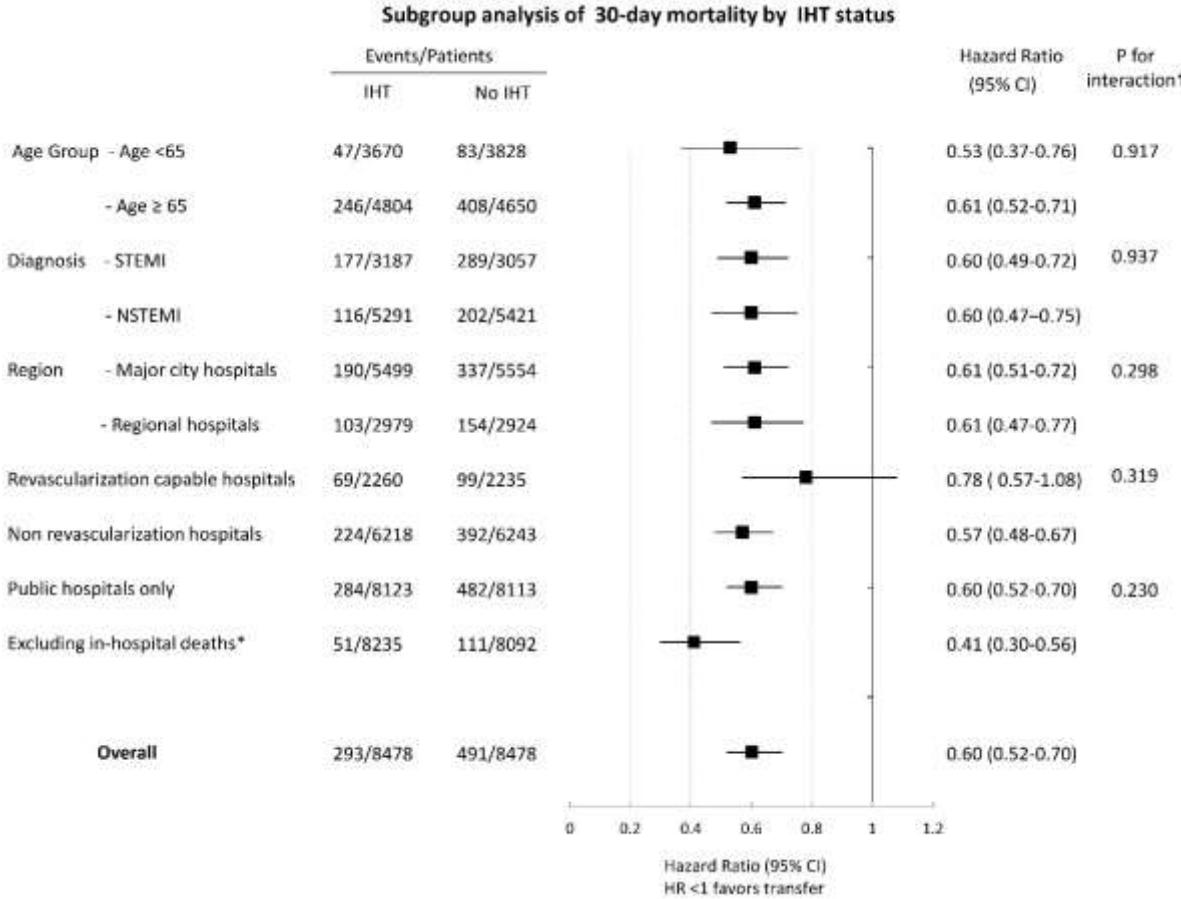

**Figure S3:** A sensitivity analysis of the potential for a single unmeasured binary confounder to explain the observed hazard ratio (HR) for long-term mortality. It shows the complex relationship required for a confounder to shift the upper 95% confidence interval of the overall treatment effect estimate from 0.70 to 1.00. For example, if an unmeasured baseline confounder were present in 10% of the patients who were transferred (green curved line) then the prevalence of the confounder in the non-transferred population has to be at least 25% and have a HR of 6.0 for mortality. If the prevalence of such a confounder were 40% or 60% in the non-transferred group then the hazard ratios that would be required for an unmeasured confounder to account for the observed lower mortality with transfer would be 2.32, and 1.82, respectively. An unmeasured confounder also has to occur prior to transfer and be independent of all other measured variables.

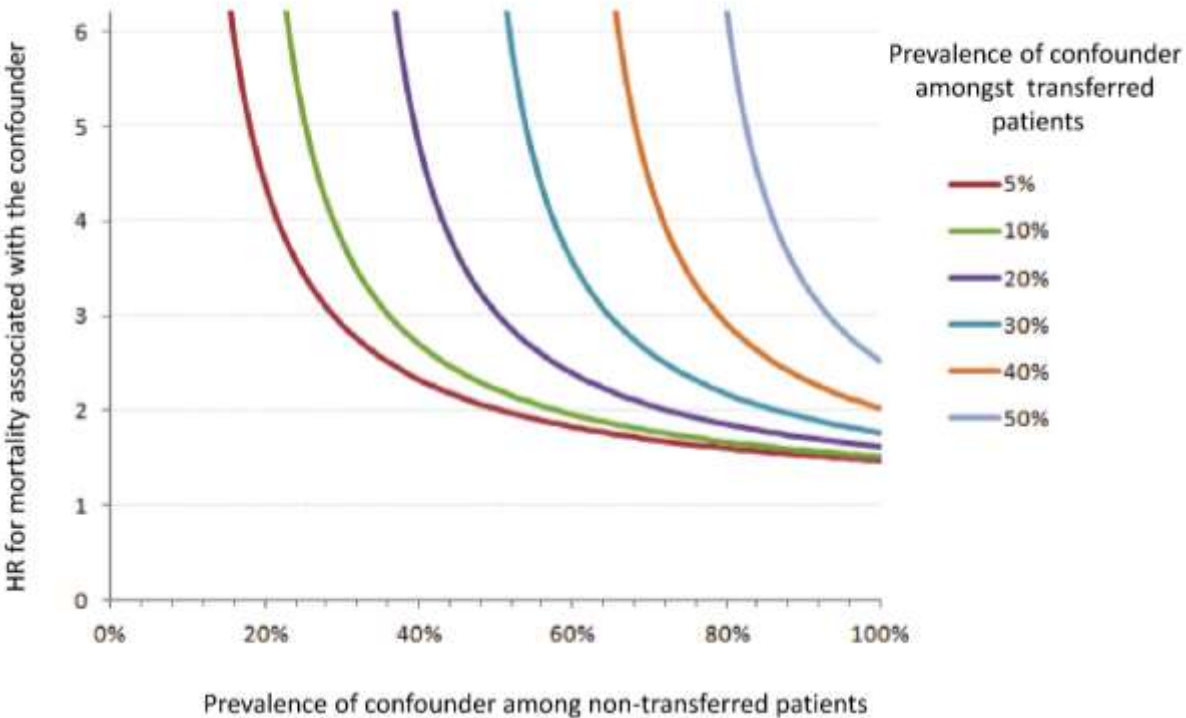

## 5. Supplementary appendix references

1. Pope GC, Kautter J, Ellis RP, Ash AS, Ayanian JZ, Lezzoni LI, et al. Risk adjustment of Medicare capitation payments using the CMS-HCC model. *Health Care Financ Rev.* 2004;25(4):119-41.
2. Pope GC ER, Ash AS, Ayanian JZ, Bates DW, Burstin H, Iezzoni LI, Marcantonio E, Wu B. Diagnostic Cost Group Hierarchical Condition Category Models for Medicare Risk Adjustment. Report Prepared for the Health Care Financing Administration. Waltham, MA: Health Economics Research, Inc; 2000.
3. Li P, Kim MM, Doshi JA. Comparison of the performance of the CMS Hierarchical Condition Category (CMS-HCC) risk adjuster with the Charlson and Elixhauser comorbidity measures in predicting mortality. *BMC Health Serv Res.* 2010;10:245.
4. Krumholz HM, Wang Y, Mattera JA, Han LF, Ingber MJ, Roman S, et al. An administrative claims model suitable for profiling hospital performance based on 30-day mortality rates among patients with an acute myocardial infarction. *Circulation.* 2006;113(13):1683-92.
5. Ko DT, Yun L, Wijeyesundera HC, Jackevicius CA, Rao SV, Austin PC, et al. Incidence, predictors, and prognostic implications of hospitalization for late bleeding after percutaneous coronary intervention for patients older than 65 years. *Circ Cardiovasc Interv.* 2010;3(2):140-7.
6. Austin PC. A Tutorial and Case Study in Propensity Score Analysis: An Application to Estimating the Effect of In-Hospital Smoking Cessation Counseling on Mortality. *Multivariate Behav Res.* 2011;46(1):119-51.
